# Supplementary material for: Geological structure as a control on floodplain groundwater dynamics
Source: Springer Nature journal article supplement (doi:10.1007/s10040-018-1885-0), 2018-11-16
Supplement: MOESM1 [file 16276830]

**Geological structure as a control on floodplain groundwater dynamics**

B.É. Ó Dochartaigh<sup>1</sup>, N.A.L. Archer<sup>2</sup>, L. Peskett<sup>3</sup>, A.M. MacDonald<sup>2</sup>, A.R. Black<sup>4</sup>, C.A. Auton<sup>2</sup>, J.E. Merritt<sup>2</sup>, D.C. Gooddy<sup>5</sup> and M. Bonell<sup>6\*</sup>

<sup>1</sup> Corresponding author: [beod@bgs.ac.uk](mailto:beod@bgs.ac.uk); British Geological Survey. The Lyell Centre, Research Avenue South, Edinburgh, EH14 4AP, UK; 0131 650 0424

<sup>2</sup> British Geological Survey. The Lyell Centre, Research Avenue South, Edinburgh, EH14 4AP, UK

<sup>3</sup> University of Edinburgh. School of GeoSciences, University of Edinburgh, Edinburgh, EH9 3FF

<sup>4</sup> University of Dundee. Geography Department, University of Dundee, Dundee, DD1 4HN, UK

<sup>5</sup> British Geological Survey. Maclean Building, Crowmarsh Gifford, Wallingford, Oxon, OX10 8BB, UK

<sup>6</sup> University of Dundee. Centre for Water Law, Water Policy and Science, University of Dundee, Dundee DD1 4HN

\*Mike Bonell, deceased July 2014

**Table S1 Mean values of selected chemistry parameters from floodplain waters at study site. Data © Tweed Forum.**

| Water source | HCO <sub>3</sub><br>mg l <sup>-1</sup> | DO <sub>2</sub><br>mg l <sup>-1</sup> | Ca<br>mg l <sup>-1</sup> | Mg<br>mg l <sup>-1</sup> | Na<br>mg l <sup>-1</sup> | K<br>mg l <sup>-1</sup> | Cl-<br>mg l <sup>-1</sup> | SO <sub>4</sub><br>mg l <sup>-1</sup> | NO <sub>3</sub><br>mg l <sup>-1</sup> | NPOC<br>mg l <sup>-1</sup> | Mn<br>µg l <sup>-1</sup> | Fe<br>µg l <sup>-1</sup> |
|--------------|----------------------------------------|---------------------------------------|--------------------------|--------------------------|--------------------------|-------------------------|---------------------------|---------------------------------------|---------------------------------------|----------------------------|--------------------------|--------------------------|
| 1A           | 80.44                                  | 8.72                                  | 27.17                    | 6.97                     | 12.40                    | 1.84                    | 13.83                     | 14.85                                 | 29.04                                 | 1.21                       | 2.23                     | 8.33                     |
| 2A           | 69.01                                  | 5.69                                  | 24.03                    | 7.27                     | 8.83                     | 1.02                    | 13.93                     | 9.22                                  | 29.55                                 | 0.66                       | 9.93                     | 57.00                    |
| 2B           | 89.89                                  | 0.24                                  | 18.90                    | 7.07                     | 9.93                     | 0.73                    | 16.47                     | 7.66                                  | 0.29                                  | 0.75                       | 458.07                   | 5592.3<br>3              |
| 3A           | 77.81                                  | 4.63                                  | 24.57                    | 7.38                     | 9.40                     | 1.36                    | 13.68                     | 9.17                                  | 23.45                                 | 0.73                       | 0.77                     | 6.67                     |
| 3B           | 70.60                                  | 3.42                                  | 23.40                    | 6.68                     | 9.27                     | 0.96                    | 13.88                     | 8.05                                  | 24.87                                 | 1.11                       | 1.10                     | 5.00                     |
| 4A           | 85.43                                  | 0.12                                  | 19.10                    | 8.42                     | 9.27                     | 0.96                    | 19.06                     | 9.55                                  | 0.34                                  | 1.10                       | 152.47                   | 27.67                    |
| 4B           | 124.85                                 | 0.11                                  | 24.13                    | 9.83                     | 7.63                     | 1.25                    | 10.77                     | 1.54                                  | 0.06                                  | 2.06                       | 425.50                   | 938.33                   |
| 5A           | 98.48                                  | 0.77                                  | 23.83                    | 10.68                    | 9.50                     | 0.80                    | 14.38                     | 11.07                                 | 16.15                                 | 0.60                       | 76.30                    | 24.67                    |
| 5B           | 96.21                                  | 0.14                                  | 21.63                    | 6.88                     | 7.90                     | 0.82                    | 11.09                     | 5.53                                  | 0.12                                  | 1.38                       | 341.33                   | 2577.6<br>7              |
| River        | 60.86                                  | 12.30                                 | 17.27                    | 6.29                     | 10.87                    | 1.30                    | 19.13                     | 8.10                                  | 8.37                                  | 4.47                       | 24.50                    | 232.67                   |
| Spring       | 72.37                                  | 5.85                                  | 24.60                    | 7.19                     | 8.60                     | 1.22                    | 12.41                     | 8.85                                  | 28.94                                 | 0.87                       | 8.55                     | 61.50                    |

For locations of piezometers and spring see Figures 1 and 2. River water samples collected adjacent to River (south) (Figure 1b). NPOC = non-purgeable organic carbon

**Table S2. Proportion of modern water in floodplain groundwaters at study site. Data ©**

**Tweed Forum.**

| Piezometer                               | 1A   | 2A   | 2B   | 3A   | 3B   | 4A   | 4B   | 5A   | 5B   |
|------------------------------------------|------|------|------|------|------|------|------|------|------|
| Number of samples                        | 3    | 3    | 3    | 3    | 2    | 2    | 3    | 3    | 3    |
| Assemblage                               | 1    | 1    | 2    | 1    | 1    | 2    | 2    | 2    | 2    |
| Minimum Modern Fraction <sup>1</sup>     | 0.14 | 0.31 | 0.23 | 0.13 | 0.42 | 0.26 | 0.15 | 0.22 | 0.27 |
| Maximum Modern Fraction                  | 0.40 | 0.56 | 0.33 | 0.48 | 0.44 | 0.34 | 0.30 | 0.45 | 0.45 |
| Range in Modern Fraction between samples | 0.26 | 0.25 | 0.10 | 0.34 | 0.02 | 0.08 | 0.15 | 0.23 | 0.18 |

|                         | Assemblage 1 | Assemblage 2 |
|-------------------------|--------------|--------------|
| Minimum Modern Fraction | 0.13         | 0.13         |
| Maximum Modern Fraction | 0.56         | 0.45         |
| Mean Modern Fraction    | 0.37         | 0.30         |

<sup>1</sup> Modern Fraction – proportion of modern water in the groundwater sample

For location of piezometers see Figures 1 and 2.
